# Supplementary material
Source: Springer Nature journal article supplement (https://www.springermedizin.de/resource/supplementary/13256_2009_984_MOESM4_ESM.pdf/9647174)

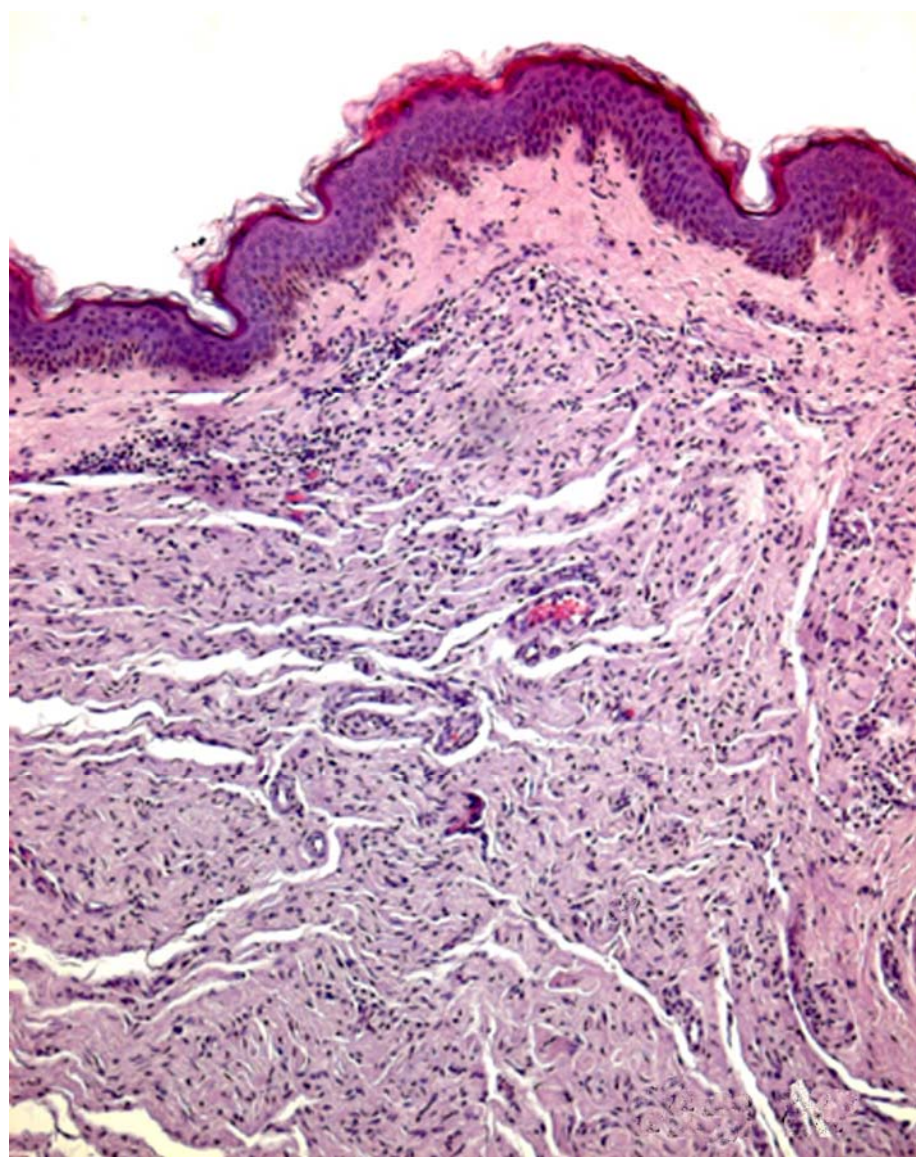

**A**

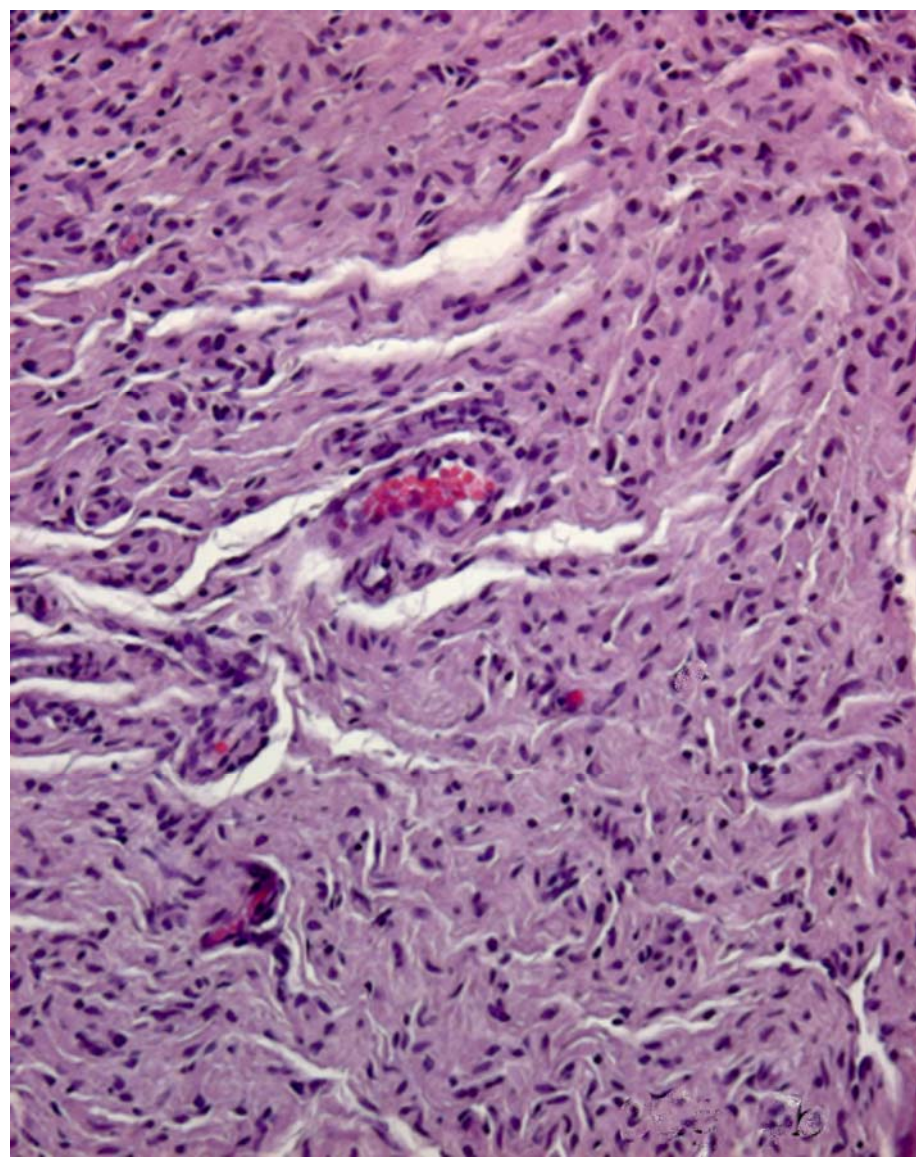

**B**

Supplement: MOESM4 [file 9647174]
